1 **Seroconversion rate and socioeconomic and ethnic risk factors for SARS-CoV-2**  
2 **infection in children in a population-based cohort**

3 Brinkmann F<sup>1</sup>, Diebner HH<sup>2</sup>, Matenar C<sup>1</sup>, Schlegtendal A<sup>1</sup>, Eitner L<sup>1</sup>, Timmesfeld N<sup>2</sup>, Maier  
4 C<sup>1</sup>, Lücke T<sup>1</sup>

5 <sup>1</sup> University Children's Hospital, Ruhr University Bochum, Germany

6 <sup>2</sup> Institute for Medical Informatics, Biometrics and Epidemiology, Ruhr- University Bochum,  
7 Germany

8

9 Abstract:

10 Introduction: Socioeconomic and ethnic background have been discussed as possible risk  
11 factors for SARS-CoV-2 infections in children. Improved knowledge could lead way to  
12 tailored prevention strategies and help to improve infection control.

13 Methods: Observational population-based cohort study in children (6mo. - 18 ys.) scheduled  
14 for legally required preventive examination and their parents in a metropolitan region in  
15 Germany. Primary endpoint was the SARS-CoV-2 seroconversion rate during study period.  
16 Risk factors assessed included age, pre-existing medical conditions, socioeconomic factors,  
17 and ethnicity.

18 Results: 2124 children and their parents were included. Seroconversion rates among  
19 children in all age groups increased by 3-4-fold from 06/2020 to 02/2021. Only 41% of  
20 seropositive children were symptomatic. In 51% of infected children at least one parent was  
21 also SARS-CoV-2 positive.

22 Low level of parental education (OR 3.13 (0.72-13.69)) significantly increased the risk of  
23 infection. Of the total cohort, 38.5% had a migration background. Specifically, 9% were of  
24 Turkish and 5% of Middle Eastern origin. These children had the highest risk for SARS-CoV-  
25 2 infections (OR 6.24 (1.38-28.12) and 6.44 (1.14-36.45) after adjustment for other risk  
26 factors.

27 Discussion: Seroprevalence of SARS-CoV-2 infections in children increased by 3-4-fold  
28 within the study period. Frequently, more than one family member was infected. Children  
29 from families with lower socioeconomic status were at higher risk. The highest risk for SARS-  
30 CoV-2 infection was identified in families with Turkish or Middle Eastern background. Culture  
31 sensitive approaches are essential to improve infection control and serve as a blueprint for  
32 vaccination strategies in this population.

NOTE: This preprint reports new research that has not been certified by peer review and should not be used to guide clinical practice.

33 Trial Registration: BMBF funding registration 01KI20173 (Corkid)

34

35 Main text

36 Introduction:

37 The rate of SARS-CoV-2 infections in children has been discussed controversially during the  
38 first months of the pandemic. Children are frequently oligo- or asymptomatic and, therefore,  
39 have been undertested and underdiagnosed. Seroconversion studies, however, reveal that  
40 the rate of SARS-CoV-2 infections in adults and children are similar [1].

41 Most infections probably take place in households where contacts are most intense [2].  
42 Cramped living conditions and poverty have been associated with a higher rate of SARS-  
43 CoV-2 infection both in adults and children as well as increased morbidity and mortality [3,4].  
44 Ethnic origin has also been described as a risk factor for hospitalization for COVID19 in  
45 children in the US [5,6]. Moreover, socioeconomic factors have been identified as risk factors  
46 for SARS-CoV-2 infection [3,7].

47 This study in an unselected asymptomatic paediatric population in a Western German  
48 metropolitan region with about 40% of families with migration background had been set up to  
49 identify risk factors for SARS-CoV-2 infection in children and adolescents.

50

51 Methods:

52 Study design and participants:

53 In a standardized approach from 06/2020 to 02/2021 all asymptomatic children and  
54 adolescents who attended outpatient paediatric practices in three regions of Western  
55 Germany for scheduled mandatory routine examinations (U-Untersuchungen) from 6 months  
56 to 18 years of age and their parents were invited to participate in the study. Participants and  
57 their parents were asked to fill in a tablet-based questionnaire available in 5 different  
58 languages. Questions included former SARS-CoV-2 infections, medical history as well as  
59 information on socioeconomic and migration background (Germany/Western Europe, Turkey,  
60 Middle East, America, Eastern and Southern Europe, and Asia). Education level was defined  
61 as the highest level of education of one of the parents/guardians. High level of education  
62 included high school/grammar school (Fachhochschule/Abitur), medium level education  
63 general secondary school (Realschule) and low-level education included education up to  
64 primary school/basic secondary school (Grundschule/Hauptschule). No educational degree  
65 formed a fourth group. Information on chronic diseases and medication was obtained from  
66 parents and verified by matching with medical charts.

67 Serum samples were analysed for SARS-CoV-2 IgM and IgG antibodies (ECLIA, Roche).

68 The target variable was SARS-CoV-2 infection given by seropositivity or positive PCR test,  
69 respectively. We aimed at comparing demographics (age, sex), underlying medical  
70 conditions, socioeconomic and migration background between children and adolescents with  
71 and without evidence of SARS-CoV-2 infection.

72 **Statistical Analysis:**

73 Descriptive statistics are depicted in tables 1 and 2. Demographic and clinical parameters  
74 (table 1) are presented along with univariate odds ratios reported with 95% confidence  
75 intervals. In addition, the impact of migration background has been analysed with adjusted  
76 random effect logistic regression (cf. table 3). Thereby, we adjusted for the ratio of number of  
77 available rooms to the number of persons living in the same household as well as for the  
78 highest educational level within the family. The ratio has been introduced to account for the  
79 correlation between number of rooms and number of persons following the rationale that the  
80 available space per person is the essential factor. Within the Corkid study, some families  
81 participated with more than one child. Therefore, we included a random effect in our model  
82 given by a family ID. Insignificance of other factors has been shown by a likelihood ratio-  
83 based model reduction process. For the random effect analysis, the lme4 software package  
84 within statistical programming language R has been used [8]. P-values less than 0.05 were  
85 considered statistically significant.

86 **Results:**

87 **Demographics and Clinical Characteristics**

88 In this cohort, initially 2848 children and adolescents were asked to participate, 25% refused,  
89 mainly because of fear of drawing blood.

90 Of the remaining 2124 (1019 girls; 48%) with medium age 7.1 years [0.6-18], 58 (2.78%) had  
91 evidence of SARS-CoV-2 infection. There were no clinical differences to SARS-CoV-2  
92 negative children. Also, the number of children with pre-existing conditions (13% vs 18%) did  
93 not significantly differ between the groups. 24 of the 58 infected children (41.3%) did not  
94 recall any infection during the preceding three months.

95 Clinical characteristics of the participants are displayed in table 1.

96 Table 1: Demographic and clinical data of participants

|  | <b>All</b> | <b>SARS-COV-2<br/>positive</b> | <b>SARS-<br/>Cov-2 nega-<br/>tive</b> | <b>odds ratio<br/>(SARS<br/>yes/no)</b> |
|--|------------|--------------------------------|---------------------------------------|-----------------------------------------|
|--|------------|--------------------------------|---------------------------------------|-----------------------------------------|

| <b>N</b>                              | <b>2124</b>   | <b>58</b>   | <b>2066</b>  |                  |
|---------------------------------------|---------------|-------------|--------------|------------------|
| <b>Girls</b>                          | 1020 (48.02%) | 27 (46.55%) | 993 (48.06%) | 0.94 (0.56-1.59) |
| <b>&lt;= 3 years</b>                  | 429 (20.2%)   | 13 (22.41%) | 416 (20.14%) | 1.15 (0.61-2.14) |
| <b>4-6 years (pre-school)</b>         | 817 (38.47%)  | 22 (37.93%) | 795 (38.48%) | 0.98 (0.57-1.67) |
| <b>7-10 years (primary school)</b>    | 290 (13.65%)  | 8 (13.79%)  | 282 (13.65%) | 1.01 (0.47-2.16) |
| <b>11-18 years (secondary school)</b> | 588 (27.68%)  | 15 (25.86%) | 573 (27.73%) | 0.91 (0.5-1.65)  |
| <b>Underweight (&lt;3 percentile)</b> | 159 (7.49%)   | 3 (5.17%)   | 156 (7.55%)  | 0.67 (0.21-2.16) |
| <b>Obesity (&gt;97% percentile)</b>   | 156 (7.34%)   | 4 (6.9%)    | 152 (7.36%)  | 0.93 (0.33-2.61) |
| <b>Any chronic medical condition</b>  | 389 (18.31%)  | 8 (13.79%)  | 381 (18.44%) | 0.71 (0.33-1.5)  |
| <b>Chronic Airway Disease</b>         | 211 (9.93%)   | 4 (6.9%)    | 207 (10.02%) | 0.67 (0.24-1.86) |

97

98 Socioeconomic and migration background

99 Within the study cohort, 766 (38.5%) children and adolescents had a migration background  
100 see table 2). Whereas 4.5% of children and adolescents with a migration background had  
101 evidence of SARS-CoV-2 infection, only 1.6% of children with Western European  
102 background had evidence of infection (OR 2.78 [1.63-4.74]). Details of socioeconomic and  
103 migration background of participants are shown in table 2a and table 2b.

104 A random effect logistic regression yields the results listed in table 3. Specifically, the highest  
105 risks for infection were detected in children of Turkish (OR 6.24 [1.38-28.13], p=0.017) and  
106 Middle Eastern (OR 6.44 [1.14- 36.45], p=0.035) origin, respectively.

107 In the Asian population seroprevalence was also high (OR 16.6 [1.07-250]), but because of  
108 the small number of participants (1.4% of the cohort) from this region of origin this result  
109 must be interpreted with caution.

110 Other risk factors relevant for risk adjustment, although below significance, included low level  
111 education of the parents (OR 3.13 [0.72-13.69]) and crowded living conditions inversely  
112 expressed by rooms per person (OR 0.35 [0.72-13.69]). Of note, these two factors turn out to  
113 have statistically significant effects in univariate analyses (see table 3).

114 Table 2a: Socioeconomic and migration background of participants

|  | <b>All</b> | <b>SARS-CoV-2 positive</b> | <b>SARS- CoV-2 negative</b> |
|--|------------|----------------------------|-----------------------------|
|  |            |                            |                             |

|                                                        |               |             |               |
|--------------------------------------------------------|---------------|-------------|---------------|
| <b>N (all=100%)</b>                                    | 2124          | 58          | 2066          |
| <b>Parents SARS-CoV-2 positive</b>                     | 61 (3.07%)    | 28 (51.85%) | 33 (1.71%)    |
| <b>SARS-CoV-2 Contact</b>                              | 261 (13.12%)  | 32 (59.26%) | 229 (11.83%)  |
| <b>Parents in high-risk occupations for Sars-CoV-2</b> | 995 (50.03%)  | 27 (50%)    | 968 (50.03%)  |
| <b>Parents Highest Educational Degree</b>              |               |             |               |
| <b>High School/Grammar School</b>                      | 1311 (65.91%) | 12 (22.22%) | 629 (32.51%)  |
| <b>General Secondary School</b>                        | 240 (12.07%)  | 7 (12.96%)  | 233 (12.04%)  |
| <b>Basic Secondary /Primary School</b>                 | 66 (3.32%)    | 6 (11.11%)  | 60 (3.1%)     |
| <b>No educational degree</b>                           | 70 (5.56%)    | 3 (6.25%)   | 67 (3.46%)    |
| <b>Migration Background Parents/Grandparents</b>       | 766 (38.51%)  | 35 (64.81%) | 731 (37.78%)  |
| <b>Turkey</b>                                          | 180 (9.05%)   | 13 (24.07%) | 167 (8.63%)   |
| <b>Middle East</b>                                     | 108 (5.43%)   | 8 (14.81%)  | 100 (5.17%)   |
| <b>Asia</b>                                            | 28 (1.41%)    | 3 (5.56%)   | 25 (1.29%)    |
| <b>CIS States (former Soviet Union)</b>                | 127 (6.39%)   | 3 (5.56%)   | 124 (6.41%)   |
| <b>Amerika</b>                                         | 11 (0.55%)    | 0 (0%)      | 11 (0.57%)    |
| <b>Eastern Europe</b>                                  | 288 (14.48%)  | 7 (12.96%)  | 281 (14.52%)  |
| <b>Southern Europe</b>                                 | 51 (2.56%)    | 1 (1.85%)   | 50 (2.58%)    |
| <b>Germany/Western Europe</b>                          | 1257 (63.2%)  | 20 (37.04%) | 1237 (63.93%) |
| <b>Members Household</b>                               |               |             |               |

|                        |               |             |               |
|------------------------|---------------|-------------|---------------|
| <b>1-3</b>             | 529 (24.91%)  | 11 (18.97%) | 518 (25.07%)  |
| <b>4-5</b>             | 1248 (58.76%) | 35 (60.34%) | 1213 (58.71%) |
| <b>&gt; 5</b>          | 156 (7.34%)   | 7 (12.07%)  | 149 (7.21%)   |
| <b>Rooms/Apartment</b> |               |             |               |
| <b>1-3</b>             | 456 (22.93%)  | 21 (38.89%) | 435 (22.48%)  |
| <b>4-5</b>             | 967 (48.62%)  | 21 (38.89%) | 946 (8.89%)   |
| <b>&gt;6</b>           | 504 (25.34%)  | 11 (20.37%) | 493 (25.48%)  |

115

116 Table 2b: Subgroup analysis of migration background and number of rooms/persons

| <b>Predictors</b>                                                  | <b>Total</b>  | <b>SARs-Cov-2 positive</b> | <b>SARS- CoV-2 negative</b> | <b>Odds ratio/ 95% CI</b> |
|--------------------------------------------------------------------|---------------|----------------------------|-----------------------------|---------------------------|
| <b>&lt; 1 room/person &amp; no migration background</b>            | 129 (6,49%)   | 5 (9,26%)                  | 124 (6,41%)                 | 1,48 (0,58-3,76)          |
| <b>&gt;= 1 room/person &amp; no migration background</b>           | 1037 (52,14%) | 13 (24,07%)                | 1024 (52,92%)               | 0,29 (0,16-0,55)          |
| <b>&lt; 1 room/person &amp; migration background</b>               | 270 (13,57%)  | 17 (31,48%)                | 253 (13,07%)                | 2,97 (1,66-5,31)          |
| <b>&gt;= 1 room/person &amp; migration background</b>              | 488 (24,53%)  | 18 (33,33%)                | 470 (24,29%)                | 1,53 (0,87-2,69)          |
| <b>&lt; 1 room/person &amp; Turkish background</b>                 | 69 (3,47%)    | 8 (14,81%)                 | 61 (3,15%)                  | 5,26 (2,39-11,57)         |
| <b>&gt;= 1 room/person &amp; Turkish background</b>                | 97 (4,88%)    | 5 (9,26%)                  | 92 (4,75%)                  | 2,02 (0,79-5,18)          |
| <b>&lt; 1 room/person &amp; Middle Eastern European background</b> | 68 (3,42%)    | 4 (7,41%)                  | 64 (3,31%)                  | 2,32 (0,81-6,59)          |
| <b>&gt;= 1 room/person &amp; Middle Eastern background</b>         | 35 (1,76%)    | 4 (7,41%)                  | 31 (1,6%)                   | 4,86 (1,66-14,26)         |
| <b>&lt; 1 room/person &amp; Eastern European background</b>        | 79 (3,97%)    | 3 (5,56%)                  | 76 (3,93%)                  | 1,43 (0,44-4,67)          |
| <b>&gt;= 1 room/person &amp; Eastern European background</b>       | 185 (9,3%)    | 3 (5,56%)                  | 182 (9,41%)                 | 0,56 (0,17-1,82)          |

117

118

119 Table 3: Results of random effect logistic regression. Intra class correlation amounts to  
120 ICC=0.7.

| Predictors                    | OR (logistic regression) | 95% -CI      | p- value | OR (univariate) | p-value |
|-------------------------------|--------------------------|--------------|----------|-----------------|---------|
| <b>Background</b>             |                          |              |          |                 |         |
| <b>Germany/Western Europe</b> | 1.0                      | -            | -        | -               | -       |
| <b>Turkey</b>                 | 6.24                     | 1.38-28.13   | 0.017    | 4.81            | < 0.001 |
| <b>Middle East</b>            | 6.44                     | 1.14- 36.45  | 0.035    | 4.95            | < 0.001 |
| <b>Eastern Europe</b>         | 1.56                     | 0.42-5.78    | 0.503    | 1.54            | n.s.    |
| <b>Asia</b>                   | 16.36                    | 1.07- 250.36 | 0.045    | 7.42            | 0.002   |
| <b>Other</b>                  | 1.26                     | 0.4-11.28    | 0.835    | 1.5             | n.s.    |
| <b>Living conditions</b>      |                          |              |          |                 |         |
| <b>Rooms/person</b>           | 0.35                     | 0.08-1.5     | 0.158    | 0.25            | 0.001   |
| <b>Level of education</b>     |                          |              |          |                 |         |
| <b>Higher level</b>           | 1.0                      | -            | -        | -               | -       |
| <b>Medium level</b>           | 1.02                     | 0.37-2.81    | 0.972    | 1.08            | Ns      |
| <b>Lower level</b>            | 3.13                     | 0.72-13.69   | 0.129    | 3.15            | 0.003   |
| <b>No educational degree</b>  | 1.63                     | 0.23-11.69   | 0.628    | 1.6             | Ns      |

121

122 Discussion:

123 This large population-based study identifies seroconversion rates and risk factors for SARS-  
124 CoV-2 infections in asymptomatic children and adolescents, attended legally required  
125 preventive examinations. Our key findings are:

- 126 • less than half of seropositive participants of all age groups did recall symptoms of  
127 infection suggesting that more than half of SARS-CoV-2 infections go unnoticed [9].
- 128 • the incidence of SARS-CoV-2 infections is significantly higher in families of Turkish or  
129 Middle Eastern decent independent of other risk factors i.e. after adjustment for other  
130 socioeconomic confounders.

131 Our cohort had increasing seroprevalence rates from 0.5% in Mid-2020 to almost 6% in the  
132 beginning of 2021 like other seroprevalence data from German or Swiss school cohorts  
133 [10,11]. The dynamics in increase of seroprevalence of SARS-CoV-2 infections matches well  
134 with national data of acute SARS-CoV-2 infection in the same geographic region [2,12]. As  
135 shown before [2] infection rates have been comparable across all age groups in keeping with  
136 the findings of other authors [1,6].

137 It is not surprising, that the known exposure to SARS-CoV-2 positive individuals doubled the  
138 risk for seroconversion. In most families, at least one parent also has evidence of SARS-  
139 CoV-2 infection, which is slightly more than described in other cohorts [13,14]. However,  
140 50% of these SARS- CoV- 2 exposed children did not develop evidence of infection.

141

142 Recent study from the US state that socioeconomically disadvantaged children, especially  
143 those from ethnic minorities, are at higher risk of infection [3,5,6]. Adult data from the UK and  
144 the US also show increased morbidity and mortality from SARS-CoV-2 in adults from ethnic  
145 minorities and with poor socioeconomic status. [4,7]. Limited access to healthcare systems  
146 and migration background might also play a role in spreading the disease [15,16].

147 The most relevant risk factor for SARS- CoV- 2 infection in our study population is a Turkish  
148 or Middle Eastern migration background. Although socioeconomic factors confound the  
149 factor of migration history to some extent, our findings result from an adjusted regression  
150 model and are therefore independent of educational standard and housing conditions.

151 Reasons for this observation could include different family and social structures favouring  
152 closer contacts and therefore increasing the risk of transmission as described in a tight knit  
153 Jewish Orthodox community in the US by Gaskell et al. [17]. Apart from that, language as  
154 well as cultural barriers might play a role [7]. Visiting friends and relatives in countries with  
155 higher incidence of infection might also further increase the risk. Scepticism regarding politics  
156 and health authorities are an additional issue, especially in prevention and vaccination  
157 programs [1]. To approach these families, tailored, culture sensitive strategies need to be  
158 developed and can serve as a blueprint for vaccination programs.

159 Limitations: Paediatric patients were recruited only from three regions (counties) in Western  
160 Germany and not all paediatric practices in the area participated. In addition, initially low  
161 seroprevalence rates could have introduced a bias. Genetic risk factors could predispose  
162 certain populations to infections with SARS- CoV-2, which was not considered in this study.  
163 The proportion of children from Turkish families, in contrast to those of other origins, was  
164 lower than expected at 9% (see table 1), whereas ca. 20% of the families in the regions  
165 studied are of Turkish origin. However, this rather indicates an underestimation of the true



166 infection rate in this group. Another limitation might be the use of surrogate parameters for  
167 the assessment of living conditions and income like number of rooms etc. Different  
168 educational grades might have posed difficulties in answering questions about educational  
169 status and might have also led to an underestimation of the corresponding risk factor. We  
170 attempted to reduce a possible bias through semi structured interviews to validate the  
171 answers drawn from the internet-based questionnaire.

172

### 173 Conclusions:

174 This study shows that poor socioeconomic status and Turkish or Middle Eastern migration  
175 background are independent risk factors for SARS-CoV-2 infection in a population-based  
176 cohort of children and adolescents in Germany.

177 Targeted interventions and tailored prevention strategies in these groups are necessary to  
178 improve infection control and to protect these vulnerable populations from excess morbidity  
179 and mortality. They could serve as a blueprint for vaccination programs and there is need to  
180 shift the focus of politics accordingly.

181

[Back to top](#)

### 182 Literature:

- 183 1. Hippich M, Siffert P, Zapardiel-Gonzalo J, Böhmer MM, Lampasona V, Bonifacio E et al.  
184 A public health antibody screening indicates a marked increase of SARS-CoV-2 exposure  
185 rate in children during the second wave. *Med (N Y)*. 2021 May 14;2(5):571-572. doi:  
186 10.1016/j.medj.2021.03.019. Epub 2021 Apr 3. PMID: 33842906
- 187 2. Brinkmann F, Schlegtendal A, Hoffmann A, Theile K, Hippert F, Strodka R et al.  
188 SARS-CoV-2 Infections Among Children and Adolescents With Acute Infections in the Ruhr  
189 Region. *Dtsch Arztebl Int*. 2021 May 28;118(21):363-364. doi:  
190 10.3238/arztebl.m2021.0227. PMID: 34247701
- 191 3. Goyal MK, Simpson JN, Boyle MD, Badolato GM, Delaney M, McCarter R et al.  
192 Racial and/or Ethnic and Socioeconomic Disparities of SARS-CoV-2 Infection Among  
193 Children. *Pediatrics*. 2020 Oct;146(4):e2020009951. doi: 10.1542/peds.2020-009951. Epub  
194 2020 Aug 5. PMID: 32759379
- 195 4. Smith AR, DeVies J, Caruso E, Radhakrishnan L, Sheppard M, Stein Z et al.  
196 Emergency Department Visits for COVID-19 by Race and Ethnicity - 13 States, October-  
197 December 2020. *MMWR Morb Mortal Wkly Rep*. 2021 Apr 16;70(15):566-569. doi:  
198 10.15585/mmwr.mm7015e3. PMID: 33857062

- 199 5. Moreira A, Chorath K, Rajasekaran K, Burmeister F, Ahmed M. Demographic  
200 predictors of hospitalization and mortality in US children with COVID-19. *Eur J Pediatr*. 2021  
201 May;180(5):1659-1663. doi: 10.1007/s00431-021-03955-x. Epub 2021 Jan 20. PMID:  
202 33474580
- 203 6. Bailey LC, Razzaghi H, Burrows EK, Bunnell HT, Camacho PEF, Christakis DA et al.  
204 Assessment of 135 794 Pediatric Patients Tested for Severe Acute Respiratory Syndrome  
205 Coronavirus 2 Across the United States. *JAMA Pediatr*. 2021 Feb 1;175(2):176-184. doi:  
206 10.1001/jamapediatrics.2020.5052. PMID: 33226415
- 207 7. Mathur R, Rentsch CT, Morton CE, Hulme WJ, Schultze A, MacKenna B et al.  
208 OpenSAFELY Collaborative. Ethnic differences in SARS-CoV-2 infection and COVID-19-  
209 related hospitalisation, intensive care unit admission, and death in 17 million adults in  
210 England: an observational cohort study using the OpenSAFELY platform. *Lancet*. 2021 May  
211 8;397(10286):1711-1724. doi: 10.1016/S0140-6736(21)00634-6. Epub 2021 Apr 30. Erratum  
212 in: *Lancet*. 2021 May 6;: PMID: 33939953
- 213 8. Bates D, Mächler M, Bolker B, Walker S. Fitting Linear Mixed-Effects Models Using  
214 lme4. *Journal of Statistical Software* 2015. 67(1). 1-48. doi: 10.18637/jss.v067.i01.
- 215 9. Tönshoff B, Müller B, Elling R, Renk H, Meissner P, Hengel H et al. Prevalence of  
216 SARS-CoV-2 Infection in Children and Their Parents in Southwest Germany. *JAMA Pediatr*.  
217 2021 Jun 1;175(6):586-593. doi: 10.1001/jamapediatrics.2021.0001. PMID: 33480966
- 218 10. Armann JP, Kirsten C, Galow L, Kahre E, Haag L, Dalpke A et al. SARS-CoV-2  
219 transmissions in students and teachers: seroprevalence follow-up study in a German  
220 secondary school in November and December 2020. *BMJ Paediatr Open*. 2021 Mar  
221 24;5(1):e001036. doi: 10.1136/bmjpo-2021-001036. PMID: 34192197
- 222 11. Ulyte A, Radtke T, Abela IA, Haile SR, Berger C, Huber M, Schanz M,  
223 Schwarzmueller M, Trkola A, Fehr J, Puhon MA, Kriemler S. Clustering and longitudinal  
224 change in SARS-CoV-2 seroprevalence in school children in the canton of Zurich.  
225 Switzerland: prospective cohort study of 55 schools. *BMJ*. 2021 Mar 17;372:n616. doi:  
226 10.1136/bmj.n616. PMID: 33731327
- 227 12. Robert Koch Institut. Coronavirus Fallzahlen.  
228 [https://www.rki.de/DE/Content/InfAZ/N/Neuartiges\\_Coronavirus/Fallzahlen.html](https://www.rki.de/DE/Content/InfAZ/N/Neuartiges_Coronavirus/Fallzahlen.html), last  
229 accessed 21.10.2021
- 230 13. Hall JA, Harris RJ, Zaidi A, Woodhall SC, Dabrera G, Dunbar JK. HOSTED-England's  
231 Household Transmission Evaluation Dataset: preliminary findings from a novel passive

- 232 surveillance system of COVID-19. *Int J Epidemiol.* 2021 Jul 9;50(3):743-752. doi:  
233 10.1093/ije/dyab057. PMID: 33837417
- 234 14. Galow L. Haag L. Kahre E. Blankenburg J. Dalpke AH. Lück C. Berner R. Armann JP.  
235 Lower household transmission rates of SARS-CoV-2 from children compared to adults. *J*  
236 *Infect.* 2021 Jul;83(1):e34-e36. doi: 10.1016/j.jinf.2021.04.022. PMID: 33930468
- 237 15. Lee EH. Kepler KL. Geevarughese A. et al. Race/Ethnicity Among Children With  
238 COVID-19-Associated Multisystem Inflammatory Syndrome. *JAMA Netw Open.*  
239 2020;3(11):e2030280. Published 2020 Nov 2. doi:10.1001/jamanetworkopen.2020.30280,  
240 PMID: 33252688
- 241 16. Saatci D, Ranger TA, Garriga C, Clift AK, Zaccardi , Tan PS et al. Association  
242 Between Race and COVID-19 Outcomes Among 2.6 Million Children in England. *JAMA*  
243 *Pediatr.* 2021 Jun 21:e211685. doi: 10.1001/jamapediatrics.2021.1685. Epub ahead of print.  
244 PMID: 34152371
- 245 17. Gaskell KM. Johnson M. Gould V. Hunt A. Stone NR. Waites W et al. SARS-CoV-2  
246 seroprevalence in a strictly-Orthodox Jewish community in the UK: A retrospective cohort  
247 study. *Lancet Reg Health Eur.* 2021 Jul; 6:100127. doi: 10.1016/j.lanepe.2021.100127.  
248 PMID: 34308409
- 249 18. de Souza WM, Buss LF, Candido DDS, Carrera JP, Li S, Zarebski AE et al.  
250 Epidemiological and clinical characteristics of the COVID-19 epidemic in Brazil. *Nat Hum*  
251 *Behav.* 2020 Aug;4(8):856-865. doi: 10.1038/s41562-020-0928-4. Epub 2020 Jul 31. PMID:  
252 32737472.
- 253
- 254
